# Supplementary material for: The Collaborative Evolution of Trust, Information Flow, and Social Cooperation: A Study on Network Stability Based on Dynamic Game Models
Source: Research Square preprint supplement (doi:10.21203/rs.3.rs-6084587/v1), 2025-04-24
Supplement: Supplementary file 1 [file 338d0889fbe232c26001488d.docx]

Table1 Score matrix of target node

| **Nodes** | **Successfully cooperation** | **Fail cooperation** |
| --- | --- | --- |
| **neighboring nodes** | **(α, α)** | **(-β, -β)** |
| **bystander nodes** | **(γ, γ)** | **(-δ, -δ)** |

Table 1: Successful interactions between adjacent nodes will bring benefits of **α** to both parties in the game, unsuccessful interactions will lead to a decrease in the evaluation of **β**; bystander nodes successfully interaction generates revenue γ, unsuccessful interaction will lead to a decrease in the evaluation of δ.
